# Supplementary material for: Experimentally designed chromatographic method for the simultaneous analysis of dimenhydrinate, cinnarizine and their toxic impurities
Source: Royal Society of Chemistry journal article supplement (doi:10.1039/d0ra09585k), 2021-01-01
Supplement: d0ra09585k1.pdf [file d0ra09585k1.pdf]

**Tab 1 S: Summary of parameters required for system suitability testing of the proposed HPLC method**

| <b>Parameters</b>                        | <b>CHP</b> | <b>BZP</b> | <b>CIN</b> | <b>DIP</b> | <b>DPP</b> | <b>Reference values<sup>60</sup></b>                    |
|------------------------------------------|------------|------------|------------|------------|------------|---------------------------------------------------------|
| <b>t<sub>R</sub></b>                     | 0.86       | 1.84       | 3.42       | 5.80       | 13.06      | -                                                       |
| <b>Tailing factor (T)</b>                | 1.02       | 1.03       | 1.05       | 1.25       | 1.42       | <2                                                      |
| <b>N</b>                                 | 525.93     | 442.20     | 1169.64    | 538.24     | 3369.15    | Increase with increase in column efficiency             |
| <b>Resolution (Rs)</b>                   |            | 3.92       | 4.16       | 3.66       | 5.00       | >2                                                      |
| <b>Selectivity (<math>\alpha</math>)</b> |            | 3.38       | 2.14       | 4.24       | 2.35       | >1                                                      |
| <b>K capacity (K')</b>                   | 0.91       | 3.08       | 6.60       | 11.88      | 28.02      | <10                                                     |
| <b>HETP (cm)</b>                         | 0.48       | 0.57       | 0.21       | 0.46       | 0.07       | The smaller the value, the higher the column efficiency |

**Tab 2 S: Results of testing method robustness**

| <b>Parameter</b>              | <b>t<sub>R</sub></b> |             |             |             | <b>Parameter</b>                | <b>t<sub>R</sub></b> |             |             |             |
|-------------------------------|----------------------|-------------|-------------|-------------|---------------------------------|----------------------|-------------|-------------|-------------|
| <b>SLS conc. (±<br/>0.01)</b> | <b>CHP</b>           | <b>BZP</b>  | <b>CIN</b>  | <b>DPP</b>  | <b>% acetonitrile (±<br/>1)</b> | <b>CHP</b>           | <b>BZP</b>  | <b>CIN</b>  | <b>DPP</b>  |
| 0.09                          | 0.88                 | 1.84        | 3.53        | 13.29       | 89                              | 0.85                 | 1.86        | 3.8         | 12.98       |
| 0.10                          | 0.86                 | 1.84        | 3.42        | 13.06       | 90                              | 0.86                 | 1.84        | 3.42        | 13.06       |
| 0.11                          | 0.84                 | 1.83        | 3.39        | 12.99       | 91                              | 0.82                 | 1.79        | 3.38        | 13.2        |
| <b>SD</b>                     | <b>0.02</b>          | <b>0.01</b> | <b>0.07</b> | <b>0.16</b> | <b>SD</b>                       | <b>0.02</b>          | <b>0.04</b> | <b>0.23</b> | <b>0.11</b> |

**Tab 3 S: The penalty points for determination of Analytical Eco-scale score of the developed and reported methods.**

| <b>Parameters</b>                                                                     | <b>Developed HPLC method</b>                                                                                                                                                                             | <b>Penalty points (PP)</b> | <b>Reported TLC-densitometric<sup>22</sup></b>                                                                                                                                                   | <b>Penalty points (PP)</b>                                                                                                                     |
|---------------------------------------------------------------------------------------|----------------------------------------------------------------------------------------------------------------------------------------------------------------------------------------------------------|----------------------------|--------------------------------------------------------------------------------------------------------------------------------------------------------------------------------------------------|------------------------------------------------------------------------------------------------------------------------------------------------|
| <b>Reagents</b><br>(PP of solvent = subtotal PP × number of pictograms × signal word) | <b>Acetonitrile</b><br>Consumed<br>volume/sample =26.<br>1mL<br><u><b>Subtotal PP = 2</b></u><br>[solvent 10-100 mL].<br><u><b>Signal word = 2</b></u><br>Danger.<br><u><b>No. of pictograms = 2</b></u> | <b>8</b>                   | <b>Hexane</b><br>Consumed<br>volume/sample =<br>1.94mL<br><u><b>Subtotal PP = 1</b></u><br>[solvent <10 mL].<br><u><b>Signal word = 2</b></u><br>Danger.<br><u><b>No. of pictograms = 4</b></u>  | <b>8</b>                                                                                                                                       |
|                                                                                       | <b>0.1% SLS</b><br>Consumed<br>volume/sample = 2.9<br>mL<br><u><b>Subtotal PP = 1</b></u><br>[solvent <10 mL].<br><u><b>Signal word = 2</b></u><br>Danger.<br><u><b>No. of pictograms = 2</b></u>        | <b>4</b>                   | <b>Ethanol</b><br>Consumed<br>volume/sample =<br>0.83mL<br><u><b>Subtotal PP = 1</b></u><br>[solvent <10 mL].<br><u><b>Signal word = 2</b></u><br>Danger.<br><u><b>No. of pictograms = 2</b></u> | <b>4</b>                                                                                                                                       |
|                                                                                       |                                                                                                                                                                                                          |                            |                                                                                                                                                                                                  | <b>Acetone</b><br>Consumed<br>volume/sample =<br>0.19mL<br><u><b>Subtotal PP = 1</b></u><br>[solvent <10 mL].<br><u><b>Signal word = 2</b></u> |

|                                             |                                     |          |                                                                                                                                                                                                  |          |
|---------------------------------------------|-------------------------------------|----------|--------------------------------------------------------------------------------------------------------------------------------------------------------------------------------------------------|----------|
|                                             |                                     |          | Danger.<br><b><u>No. of pictogram</u></b><br><b><u>=2</u></b>                                                                                                                                    |          |
|                                             |                                     |          | <b>Glacial acetic acid</b><br>Consumed volume =<br>0.14 mL<br><b><u>Subtotal PP = 1</u></b><br>[solvent <10 mL].<br><b><u>Signal word = 2</u></b><br>Danger<br><b><u>No. of pictogram =2</u></b> | <b>4</b> |
| <b>Instruments</b>                          | ≤1.5 kWh per sample                 | <b>1</b> | ≤1.5 kWh per<br>sample                                                                                                                                                                           | <b>1</b> |
|                                             | Analytical process<br>hermitization | <b>0</b> | Analytical process<br>hermitization                                                                                                                                                              | <b>0</b> |
|                                             | Waste >10 mL                        | <b>5</b> | 1-10 mL Waste                                                                                                                                                                                    | <b>3</b> |
| <b>Total penalty points</b>                 | <b>18</b>                           |          | <b>24</b>                                                                                                                                                                                        |          |
| <b>Analytical Eco-Scale total<br/>score</b> | <b>88</b>                           |          | <b>76</b>                                                                                                                                                                                        |          |

**Tab 4 S: Green Analytical Procedure Index parameters for the developed and reported methods**

| <b>Parameters</b>                      | <b>Developed HPLC method</b> | <b>Reported TLC-densitometric method<sup>22</sup></b> |
|----------------------------------------|------------------------------|-------------------------------------------------------|
| <b>Sample preparation</b>              |                              |                                                       |
| Collection (1)                         | Off-line                     | Off-line                                              |
| Preservation (2)                       | None                         | None                                                  |
| Transport (3)                          | None                         | None                                                  |
| Storage (4)                            | Under normal conditions      | Under normal conditions                               |
| Type of method: direct or indirect (5) | Filtration                   | Filtration                                            |
| Scale of extraction (6)                | Microextraction              | Microextraction                                       |
| Solvents/reagents used (7)             | Green                        | Non green                                             |
| Additional treatments (8)              | None                         | -                                                     |
| <b>Reagents and solvents</b>           |                              |                                                       |
| Amount (9)                             | 10-100 g                     | 1-10 g                                                |
| Health hazards (10)                    | 2 or 3                       | 1 or 2 or 3                                           |
| Safety hazards (11)                    | 1 or 3                       | 0 or 1 or 3                                           |
| <b>Instrumentation</b>                 |                              |                                                       |
| Energy (12)                            | ≤1.5 kWh per sample          | ≤1.5 kWh per sample                                   |
| Occupational hazard (13)               | Hermetic sealing             | -                                                     |
| Waste (14)                             | >10                          | 1-10 mL                                               |
| Waste treatment (15)                   | Recycling possible           | Recycling possible                                    |
| <b>Quantification</b>                  | Yes                          | Yes                                                   |

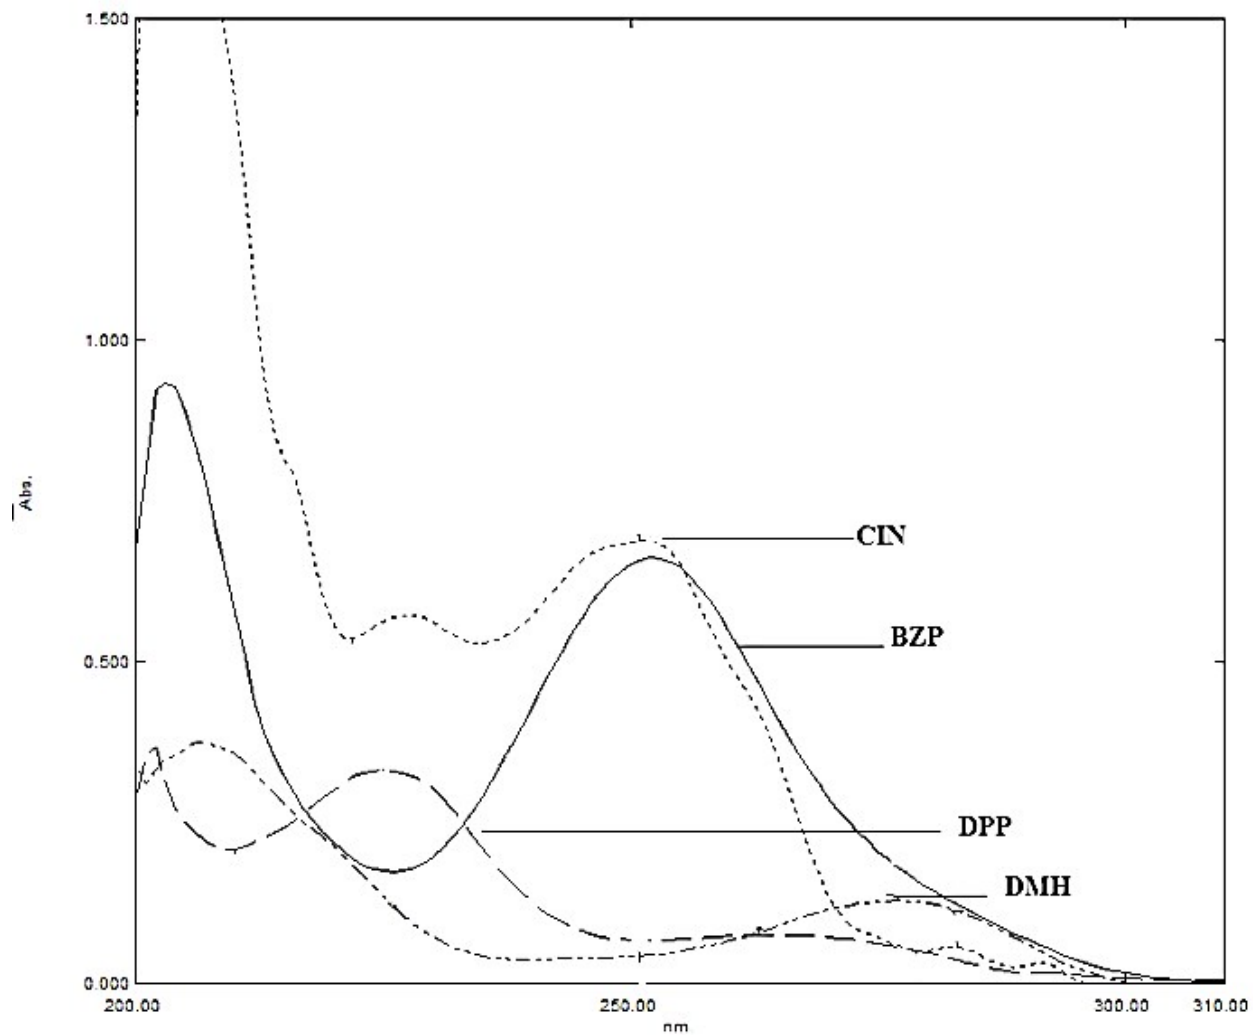

Fig. 1 S: UV spectra of 10  $\mu\text{g/mL}$  of the studied compounds in methanol

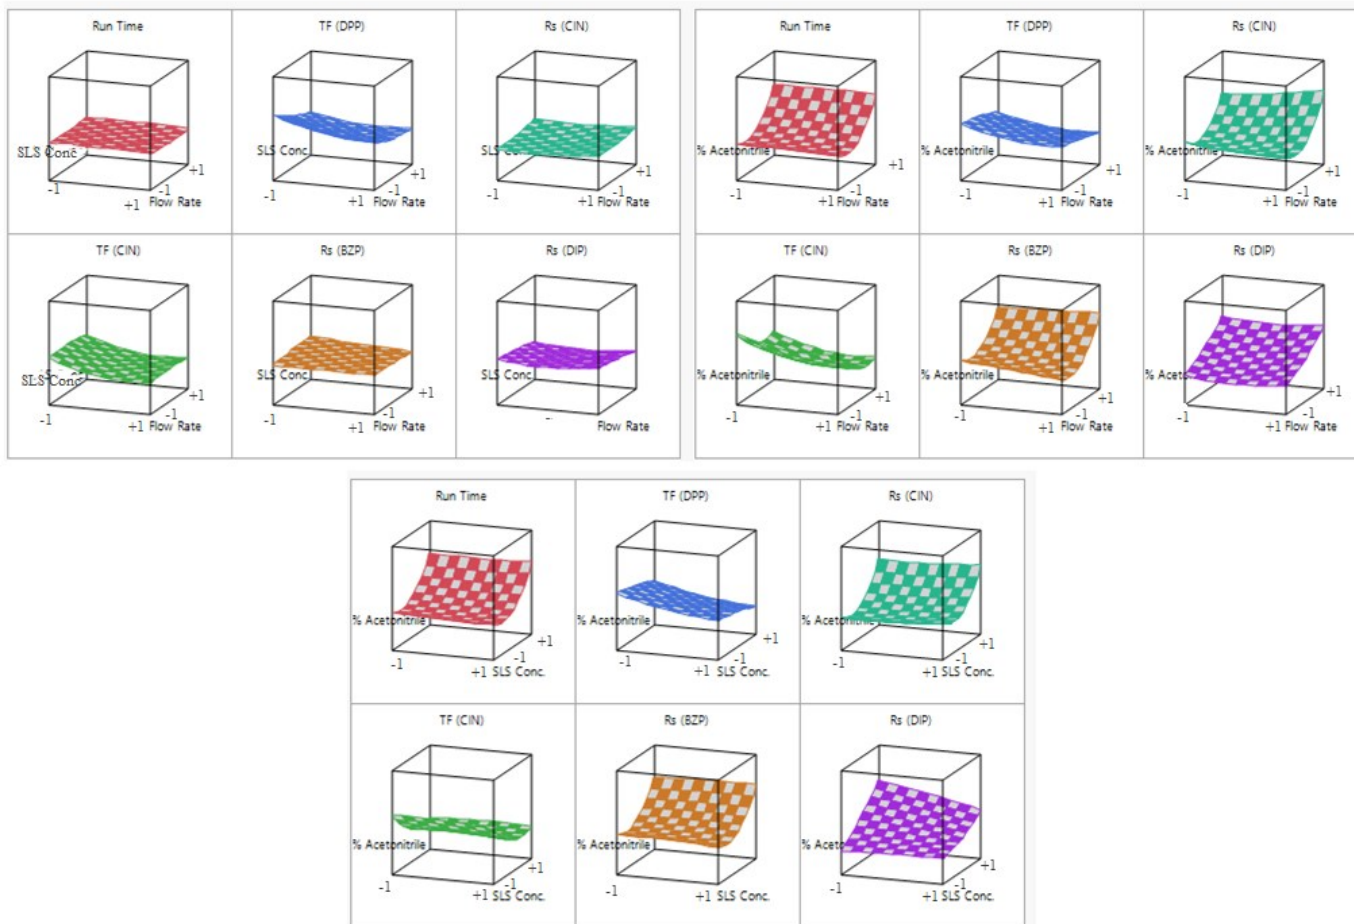

**Fig. 2 S: Surface plots for the measured responses**

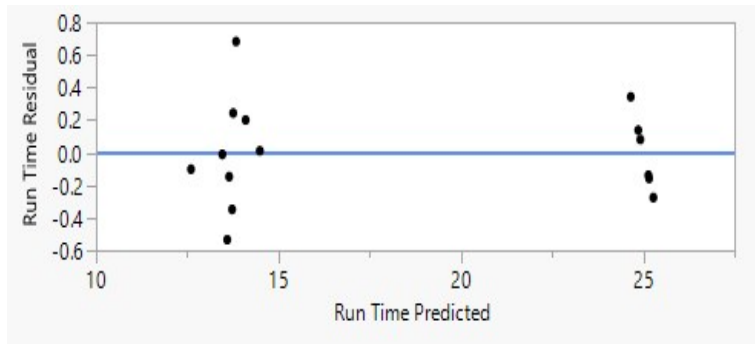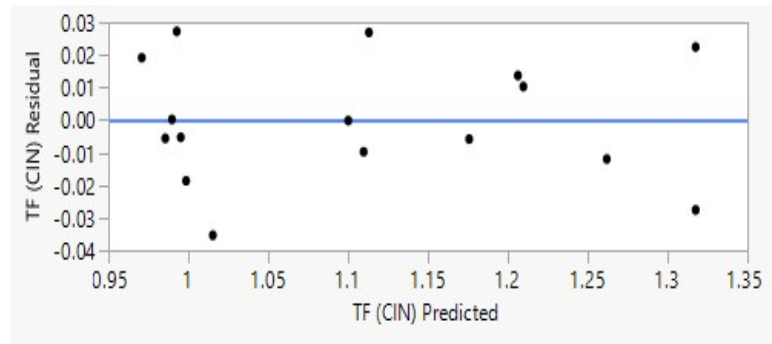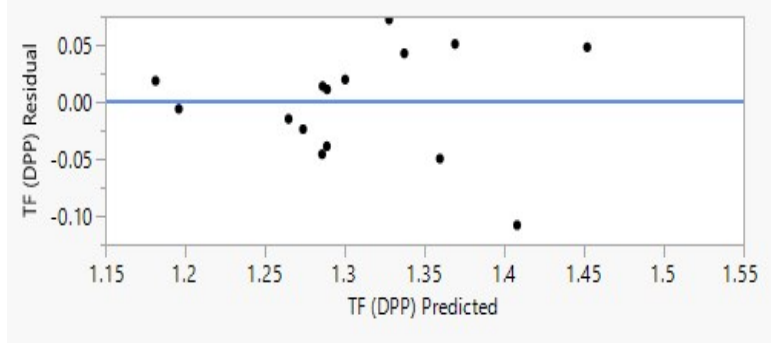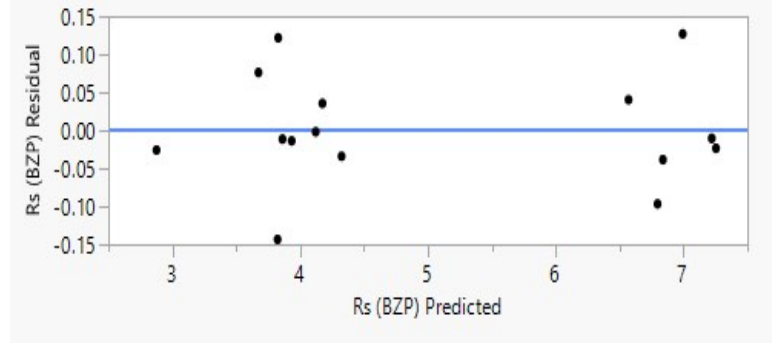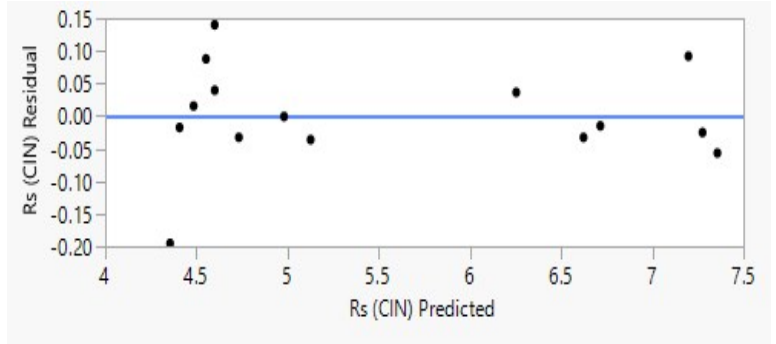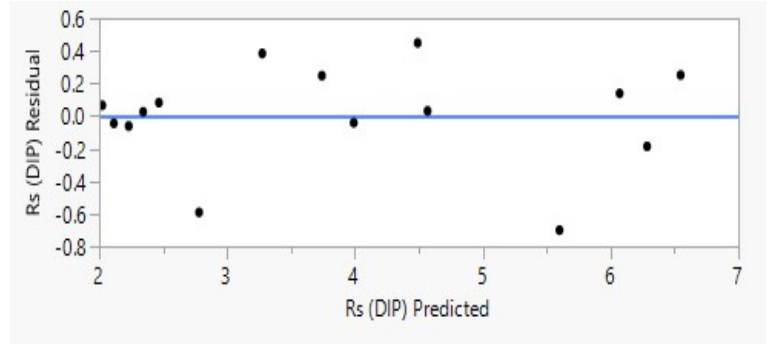

**Fig 3 S: Residuals by predicted plots**
